# Supplementary material
Source: PubMed Central journal article supplement (PMC6283441)
Supplement: jc.2016-2963_Supplemental_Materials.pdf [file jc.2016-2963_Supplemental_Materials.pdf]

**What is your current age (years)?**

18 - 25

26 - 35

36 - 45

46 - 55

>56  
years

---

**Are you:**

A woman diagnosed with PCOS? \_\_\_\_\_

A woman who suspects she has PCOS but  
has not yet received a diagnosis from a  
medical doctor? \_\_\_\_\_

Other (please specify) \_\_\_\_\_

---

**What is your country of birth?**

\_\_\_\_\_

---

**What country do you now live in?**

\_\_\_\_\_

---

**When was the diagnosis of PCOS made?  
(year/s ago)**

\_\_\_\_\_

---

**Did you see more than 1 health professional before the diagnosis was made?**

Yes       No

---

**If you answered yes to the question above, how many health professionals do you see?**

\_\_\_\_\_

---

**From the time you first saw a health professional about your symptoms, was the diagnosis of PCOS made within:**

- 6 months
  - 12 months
  - 2 years
  - greater than 2 years
- 

**How satisfied were you with your experience of PCOS diagnosis?**

- Very satisfied
  - Satisfied
  - Neither
  - Dissatisfied
  - Very dissatisfied
- 

**How satisfied were you with the information that was given to you about PCOS at the time of diagnosis?**

- Very satisfied
- Satisfied
- Neither

- Dissatisfied
  - Very dissatisfied
- 

**How satisfied were you with the information that was given to you about lifestyle management (including a healthy diet and optimal exercise) at the time of diagnosis?**

- Very satisfied
  - Satisfied
  - Neither
  - Dissatisfied
  - Very dissatisfied
  - This information was not mentioned
- 

**How satisfied were you with the information that was given to you about medical therapy (e.g. prescription medication) at the time of diagnosis?**

- Very satisfied
  - Satisfied
  - Neither
  - Dissatisfied
  - Very dissatisfied
  - This information was not mentioned
- 

**How satisfied were you with the information that was given to you about long term health complications at the time of diagnosis?**

- Very satisfied
- Satisfied
- Neither
- Dissatisfied
- Very dissatisfied
- This information was not mentioned

---

**How satisfied were you with the emotional support and counseling after diagnosis?**

- Very satisfied
- Satisfied
- Neither
- Dissatisfied
- Very dissatisfied
- This information was not mentioned

---

**Which of the following do you believe are the 4 key clinical features of PCOS that are most important to you? (please select up to 4 features)**

**Please note this is a general list and not all have been associated with PCOS.**

- Irregular menstrual cycles/periods
- Premenstrual syndrome (PMS)
- Increased tendency for weight gain
- Difficulty losing weight
- Improvement of symptoms after weight loss
- Improvement of symptoms with exercise
- Migraines
- Anxiety
- Reduced quality of life
- Depression
- Body image dissatisfaction
- Hormone imbalance
- Insulin resistance
- Increased risk of type 2 diabetes
- Increased cardiovascular risk factors
- Excess male type hormones
- Excess hair growth
- Scalp hair loss
- Acne

- Ovarian cancer
  - Endometrial cancer
  - Surgery for ovarian cysts
  - Infertility
  - Cysts on ovaries
  - Pregnancy complications
    - Increased risk of gestational diabetes (diabetes in pregnancy)
  - Fatty liver
  - Sleep apnea and snoring
- 

**How can we best support you and other women with PCOS?  
(please check as many as preferred)**

- Provide broadly available educational materials
  - Support and present at patient forums and workshops
  - Maintain a consumer website
  - Send a regular update email on PCOS
  - Other
-
